# Supplementary material
Source: PubMed Central journal article supplement (PMC6264738)
Supplement: jci-128-96610-s233.pdf [file jci-128-96610-s233.pdf]

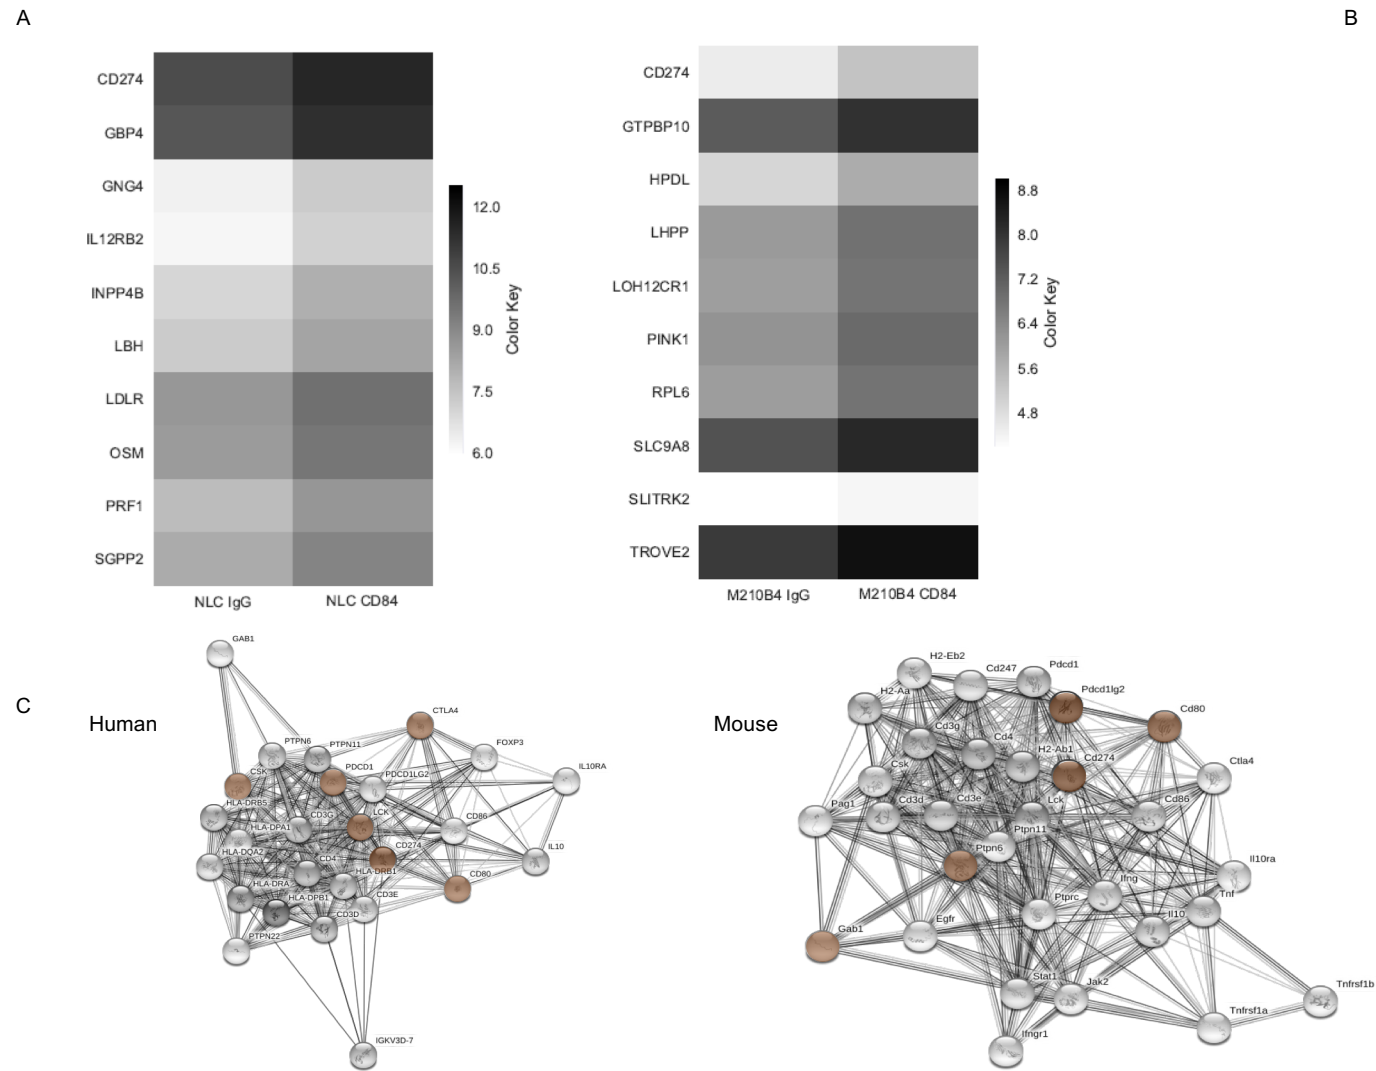

Fig S1- CD84 activation increases PD-L1

(A) Nurse like cells (NLC) or M210B4 cells were stimulated with anti-CD84 (5 mg/ml) or control IgG antibodies. Thereafter RNA was purified and analyzed by Affymetrix Human Gene 1.0 ST or Affymetrix Mouse Gene 2.0 ST, respectively. Thereafter, ten genes were selected based on high increase with anti-CD84 compared to control IgG and their intensities displayed by heatmaps.

(B) Nurse like cells (NLC) or M210B4 cells were stimulated with anti-CD84 (5 mg/ml) or control IgG antibodies. Thereafter RNA was purified and analyzed by Affymetrix Human Gene 1.0 ST or Affymetrix Mouse Gene 2.0 ST, respectively. Thereafter, ten genes found in both mouse and human were selected based on known interaction found between PD-L1 (CD274) and other proteins from the STRING database (C) Images from STRING database displaying proteins known to interact with PD-L1 (CD274), proteins found to increase in the Affymetrix chip (B) are marked in red.

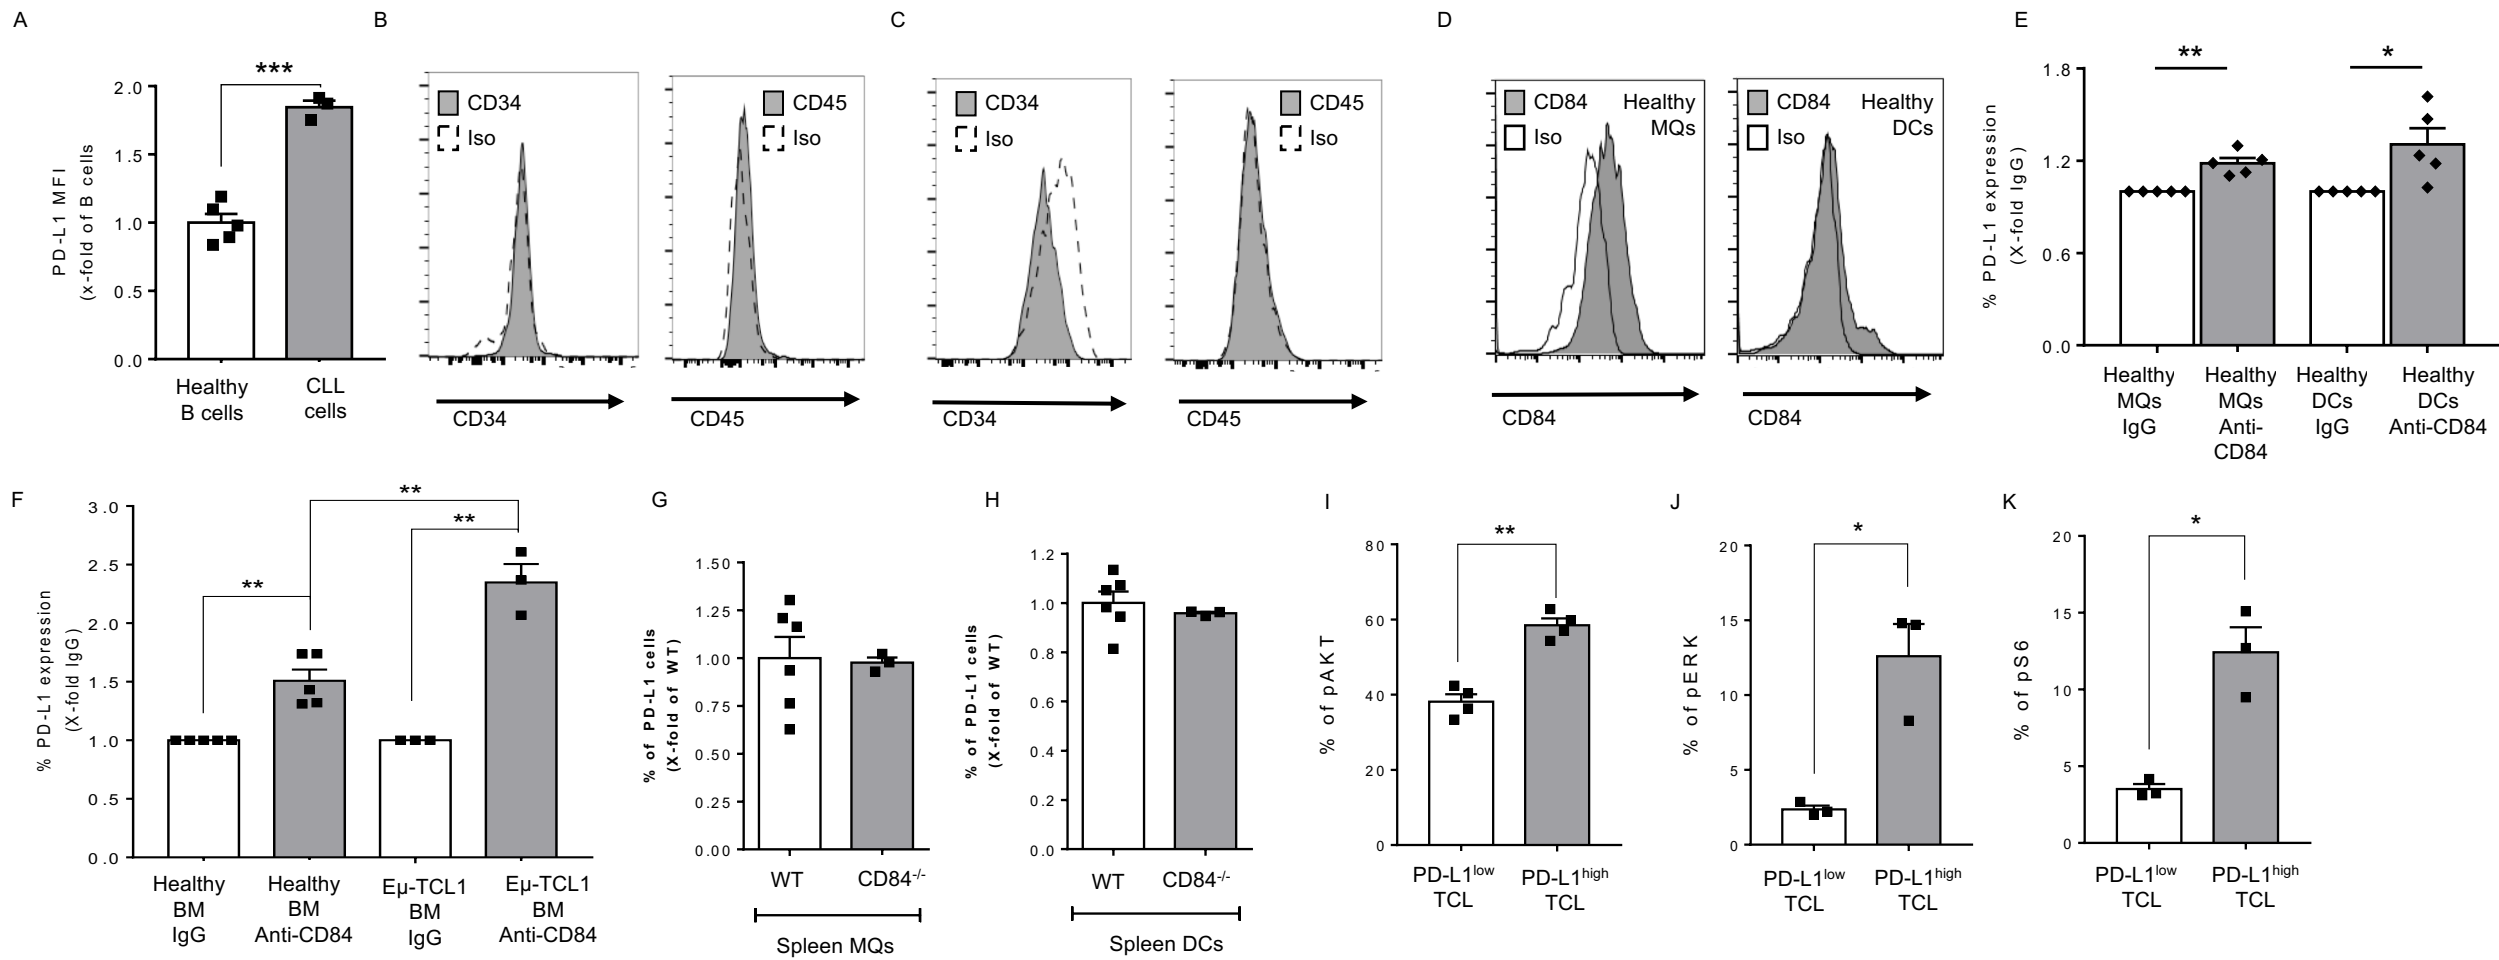

Fig S2- CD84 regulates PD-L1 expression on CLL cells and their microenvironment.

(A) CLL cells or healthy B cells were analyzed for PD-L1 expression by FACS analysis. Graph shows MFI levels of PD-L1 (n=3-5, Two tailed T-test, \*\*\*p<0.001). (B-C) Human (B) and mouse (C) adherent cells derived from bone marrow cultures stained for CD34 and CD45. Gray- staining compared to black dashed line. (D-E) Splenic MQs and DCs (D) from healthy animals were analyzed for CD84 cell surface expression, or (E) stimulated with anti-CD84 (5 mg/ml) or control IgG antibodies. PD-L1 cell surface expression was analyzed on the activated cells (n=5, Two tailed Paired T-test, \*p<0.05, \*\*p<0.01). (F) Bone marrow stromal cells were harvested from either healthy or *Eμ-TCL1* sick mice and cultured until confluent. The cells were then stimulated with anti-CD84 (4 mg/ml) for 48 hrs, and their PD-L1 expression was determined (n=3-5, One Way Anova with Holm corrected multiple comparisons, \*\*p<0.01). (G-I) Purified splenocytes from *Eμ-TCL* mice, were gated for CD5 CD19 and PD-L1, and analyzed for pAkt (G), pS6 (H), and pERK (I) (n=3, Two tailed Paired T-test, \*p<0.05, \*\*p<0.01).

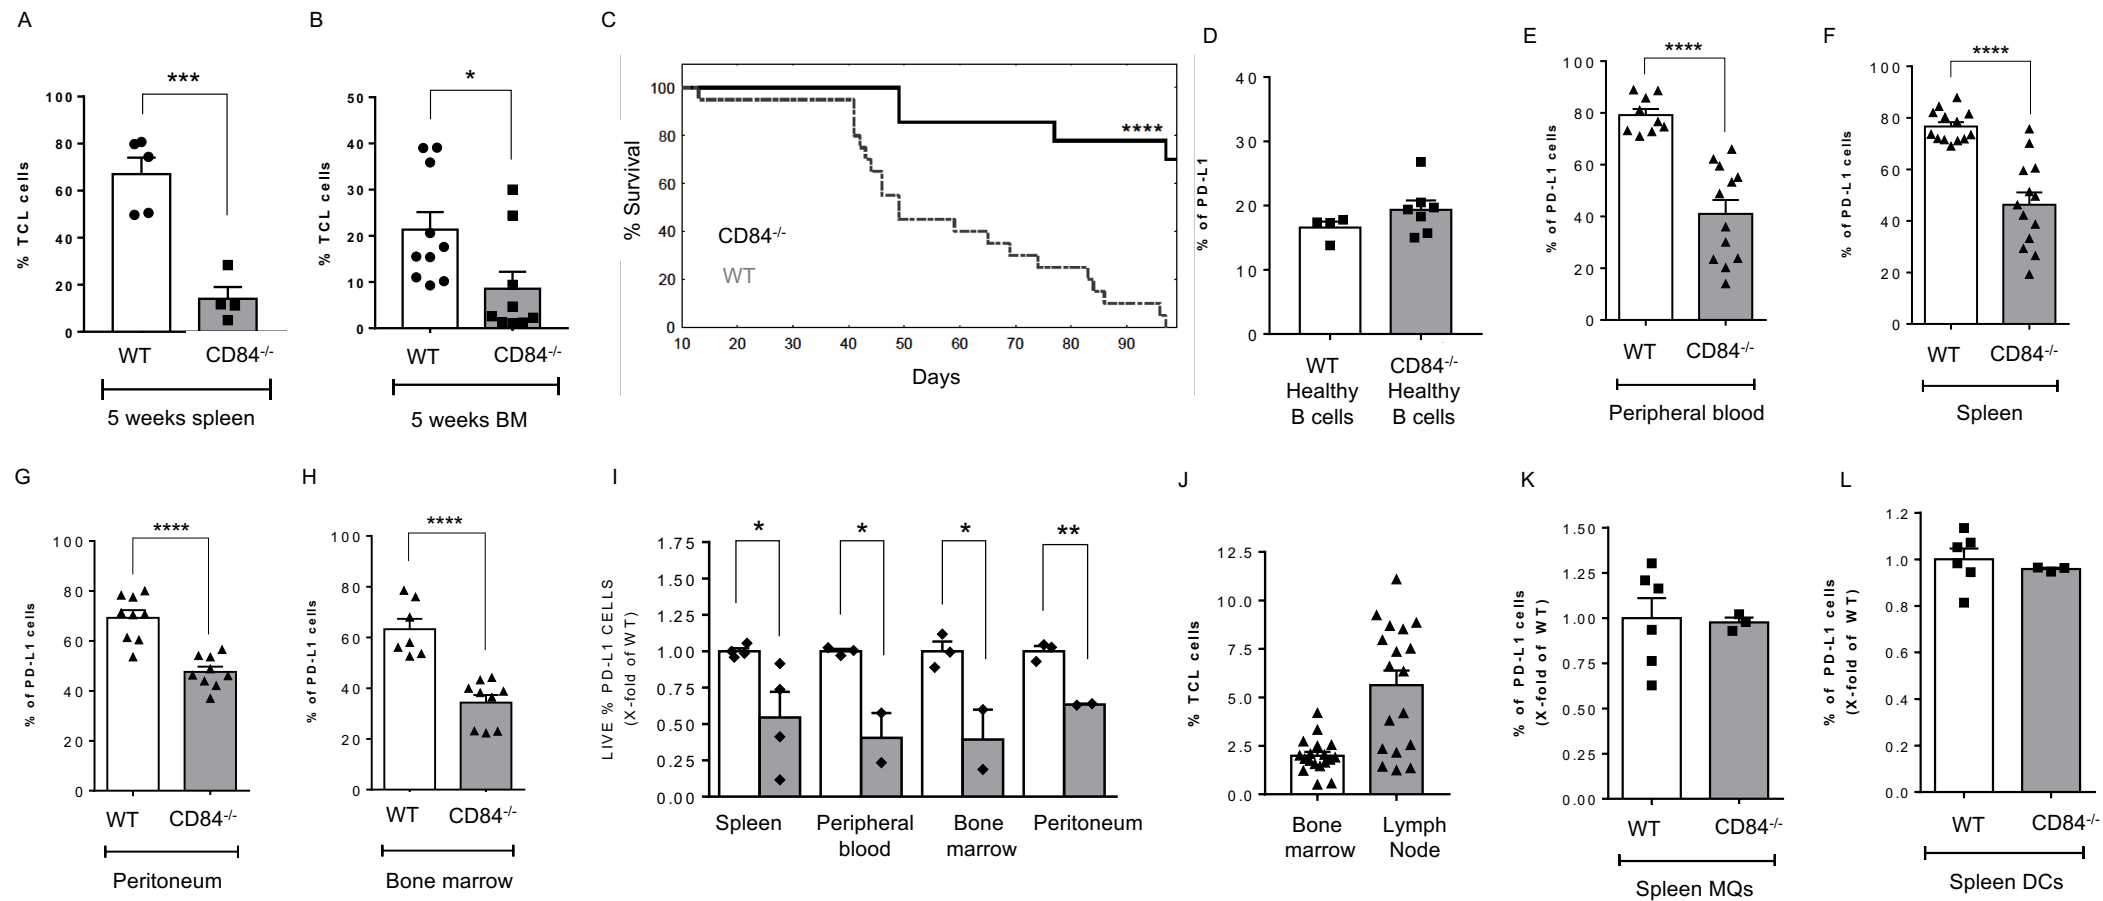

Fig S3- Decreased PD-L1 expression and elevated survival in the absence of CD84 in the tumor microenvironment.

Eμ-TCL1 splenocytes ( $4 \times 10^7$ ) were injected i.v. into the tail vein of C57BL/6 WT or *CD84*<sup>-/-</sup> mice. (A-B) After 5 weeks, the mice were sacrificed and the number of Eμ-TCL1 cells was determined in spleen (A) and BM (B) (n=4-10, Two tailed T-test, \*\*p<0,01, \*p<0,05). (C) Mice were monitored daily for survival. The figure displays the survival curves of *CD84*<sup>-/-</sup> mice compared to WT mice (n = 14-20, \*\*\*\*p<0.0001, Log-rank test). (D) Splenic B cells from healthy WT and *CD84*<sup>-/-</sup> mice were stained for PD-L1 expression (n=4-7, Two tailed T-test, p=0.2194). (E-I) Eμ-TCL1 splenocytes ( $4 \times 10^7$ ) were injected i.v. into the tail vein of C57BL/6 WT or *CD84*<sup>-/-</sup> mice. After 14-21 days, the mice were sacrificed and the percentage of PD-L1 positive cells was analyzed in WT and *CD84*<sup>-/-</sup> in peripheral blood (E), spleen (F), peritoneum (G), bone marrow (H) (n=7-11, Two tailed T-test, \*\*\*\*p<0,0001), and in the live Annexin-V and 7AAD negative population (I) (n=2-4, Two tailed T-test, \*\*p<0,01, T-test, \*p<0,05). (J) Percentage of Eμ-TCL1 cells in BM and spleen at 21 days after i.v. injection of Eμ-TCL1 splenocytes (n=17-18). (K-L) Expression of PD-L1 on splenic monocytes and DCs derived from healthy WT and *CD84*<sup>-/-</sup> mice (n=3-6).

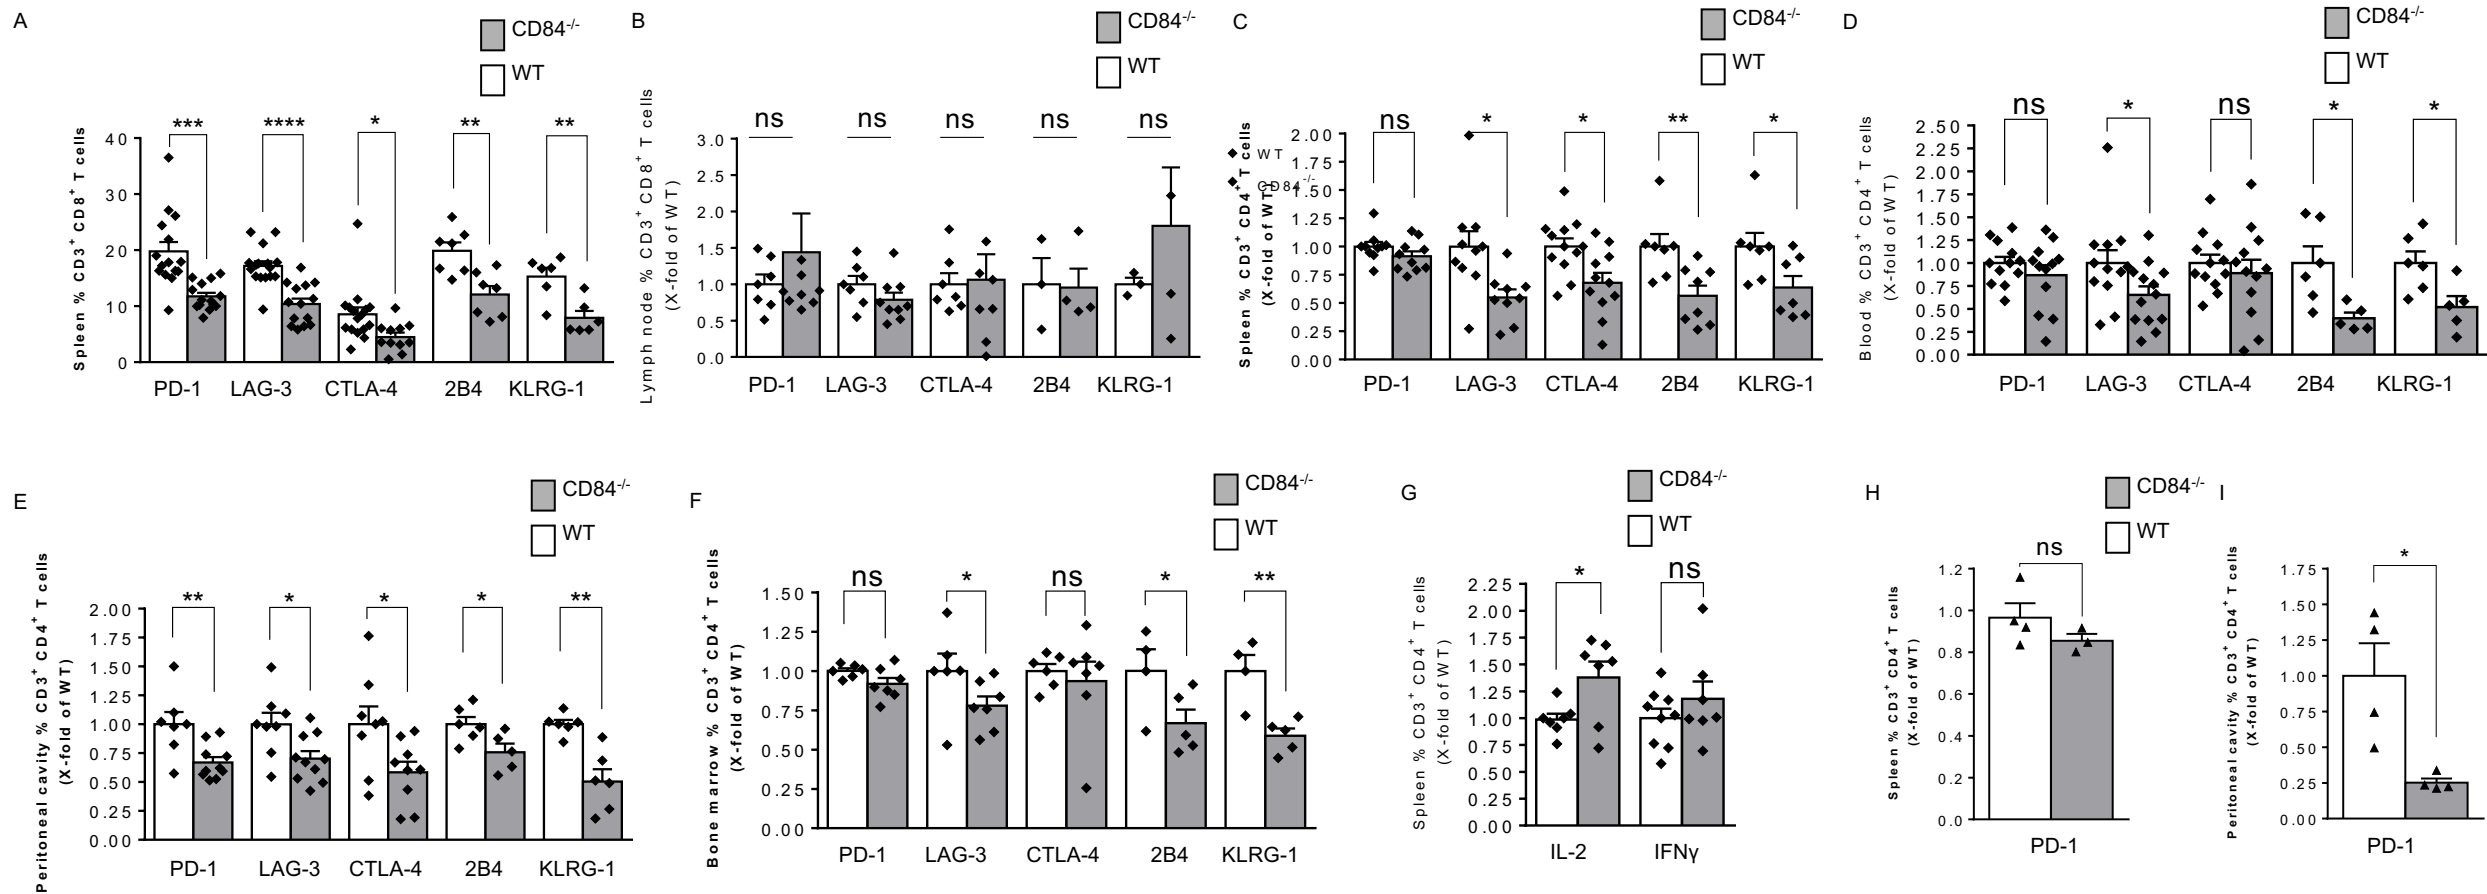

Fig S4-Reduction in exhausted T cell phenotype in the *CD84*<sup>-/-</sup> environment.

(A-F) *E $\mu$ -TCL1* splenocytes ( $4 \times 10^7$ ) were injected i.v. into the tail vein of C57BL/6 WT or *CD84*<sup>-/-</sup> mice. After 14-21 days, the mice were sacrificed. (A-B) Percent of PD-1, Lag-3, CTLA-4, 2B4, and KLRG-1 positive CD8 T cells in (A) spleen (n=6-11, Two tailed T-test, \*\*\*\*p<0.0001, \*\*\*p<0.001, \*\*p<0.01, \*p<0.05) and (B) lymph node (n=3-9). (C-F) Expression of the exhaustion markers PD-1, Lag-3, CTLA-4, 2B4 and KLRG1 was determined on CD4 in (C) spleen (n=6-11, Two tailed T-test, ns = not significant, \*p<0.05, \*\*p<0.01), (D) peripheral blood (n=5-11, Two tailed T-test, ns p =, \*p<0.05, ns p =), (E) peritoneal cavity (n=6-10, Two tailed T-test, \*p<0.05, \*\*p<0.01) and (F) bone marrow (n=4-7, Two/One Tailed T-test, ns = not significant, \*p<0.05, ns = not significant, \*\*p<0.01). (G) Splenic cells were cultured for 24 hrs with anti-CD3, and in the last 2 hours of culture with brefeldin-A. CD4 T cells were then analyzed for IFN $\gamma$  and IL-2 (n=7-8, Two tailed T-test, \*p<0.05, ns = not significant). (H-I) BM cells ( $5 \times 10^6$ ) derived from 8-week-old *E $\mu$ -TCL1* mice or negative control littermates (WT) were injected into lethally irradiated C57BL/6 (WT) or *CD84*<sup>-/-</sup> mice. After 6 months, mice were killed, and the expression of PD-1 was determined on CD4 T cells in the spleen (H) and peritoneum (I) (n=3-4, Two tailed T-test, \*p<0.05, ns = not significant).

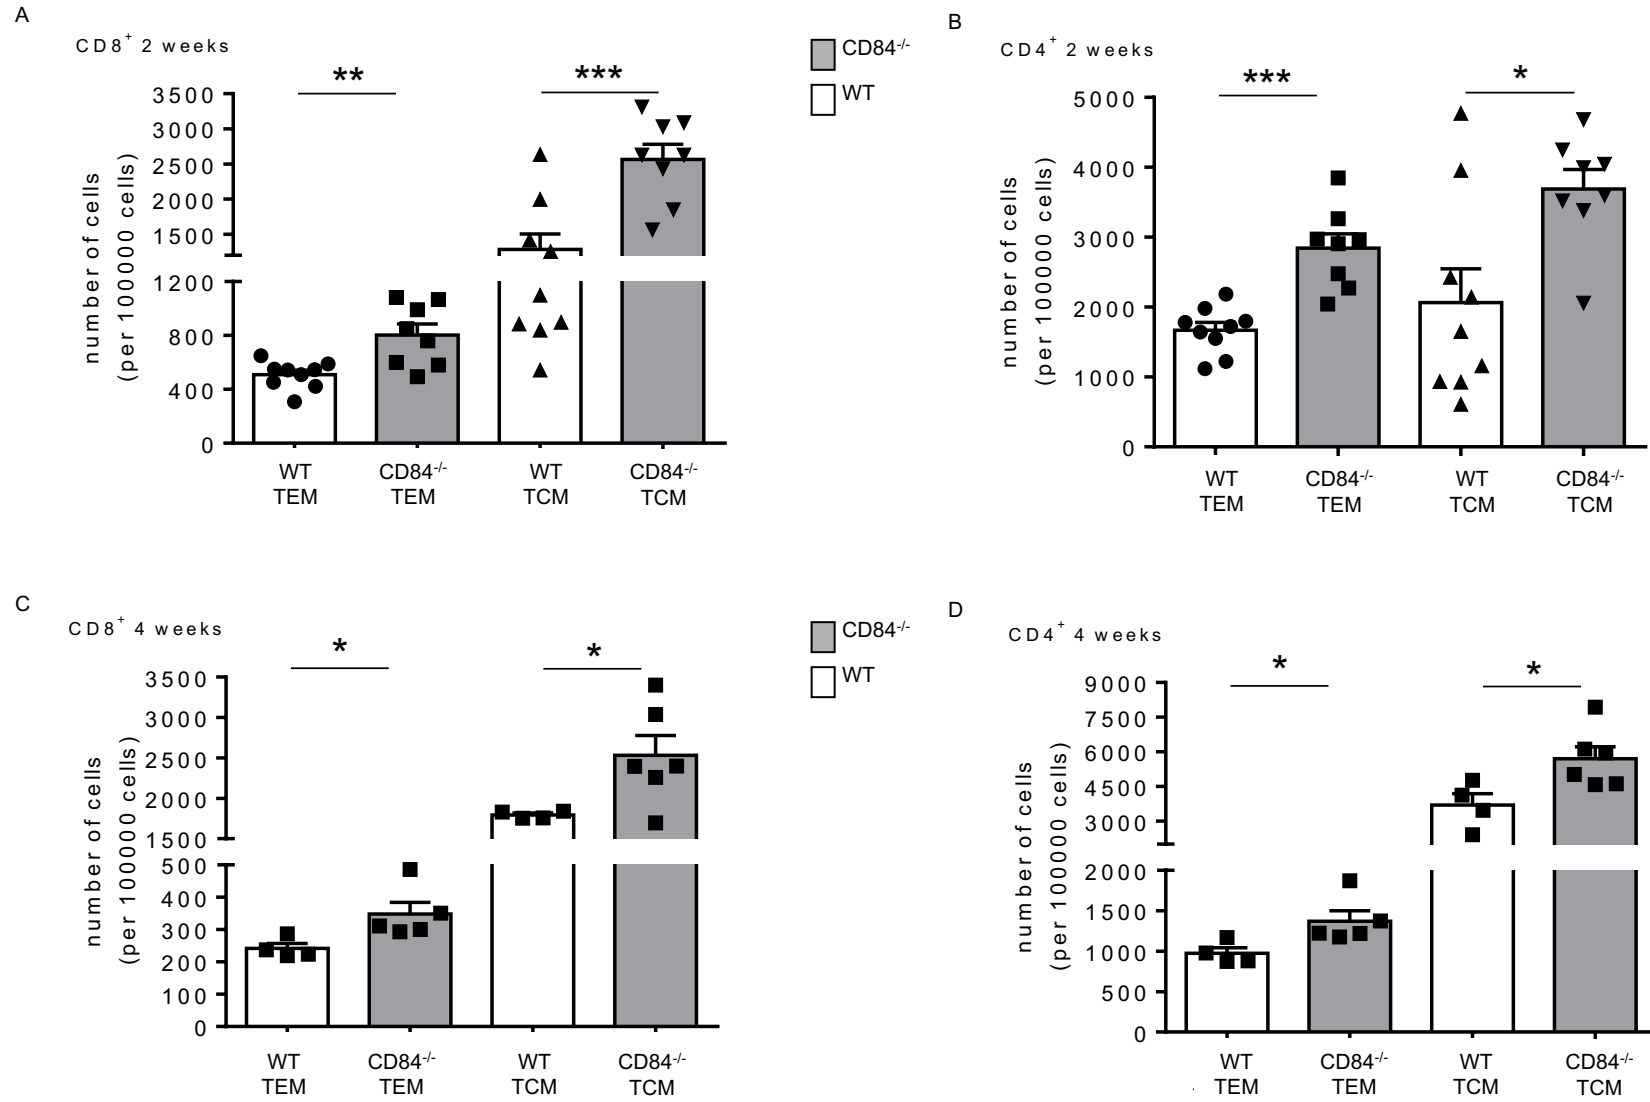

Fig S5- The TEM and TCM populations are increased in the CD84<sup>-/-</sup> environment. Eμ-TCL1splenocytes ( $4 \times 10^7$ ) were injected i.v. into the tail vein of C57BL/6 WT or CD84<sup>-/-</sup> mice. After 14 (A-B), or 28 (C-D) days, the mice were sacrificed. Splenocytes were analyzed for CD8 (A,C), and CD4 (B,D). The number of TEM (CD44<sup>+</sup>, CD62L<sup>-</sup>) and TCM (CD44<sup>+</sup>, CD62L<sup>+</sup>) was determined by flow cytometry (n=4-9, Two tailed T-test, \*p<0.05, \*\*p<0.01, \*\*\*p<0.001).

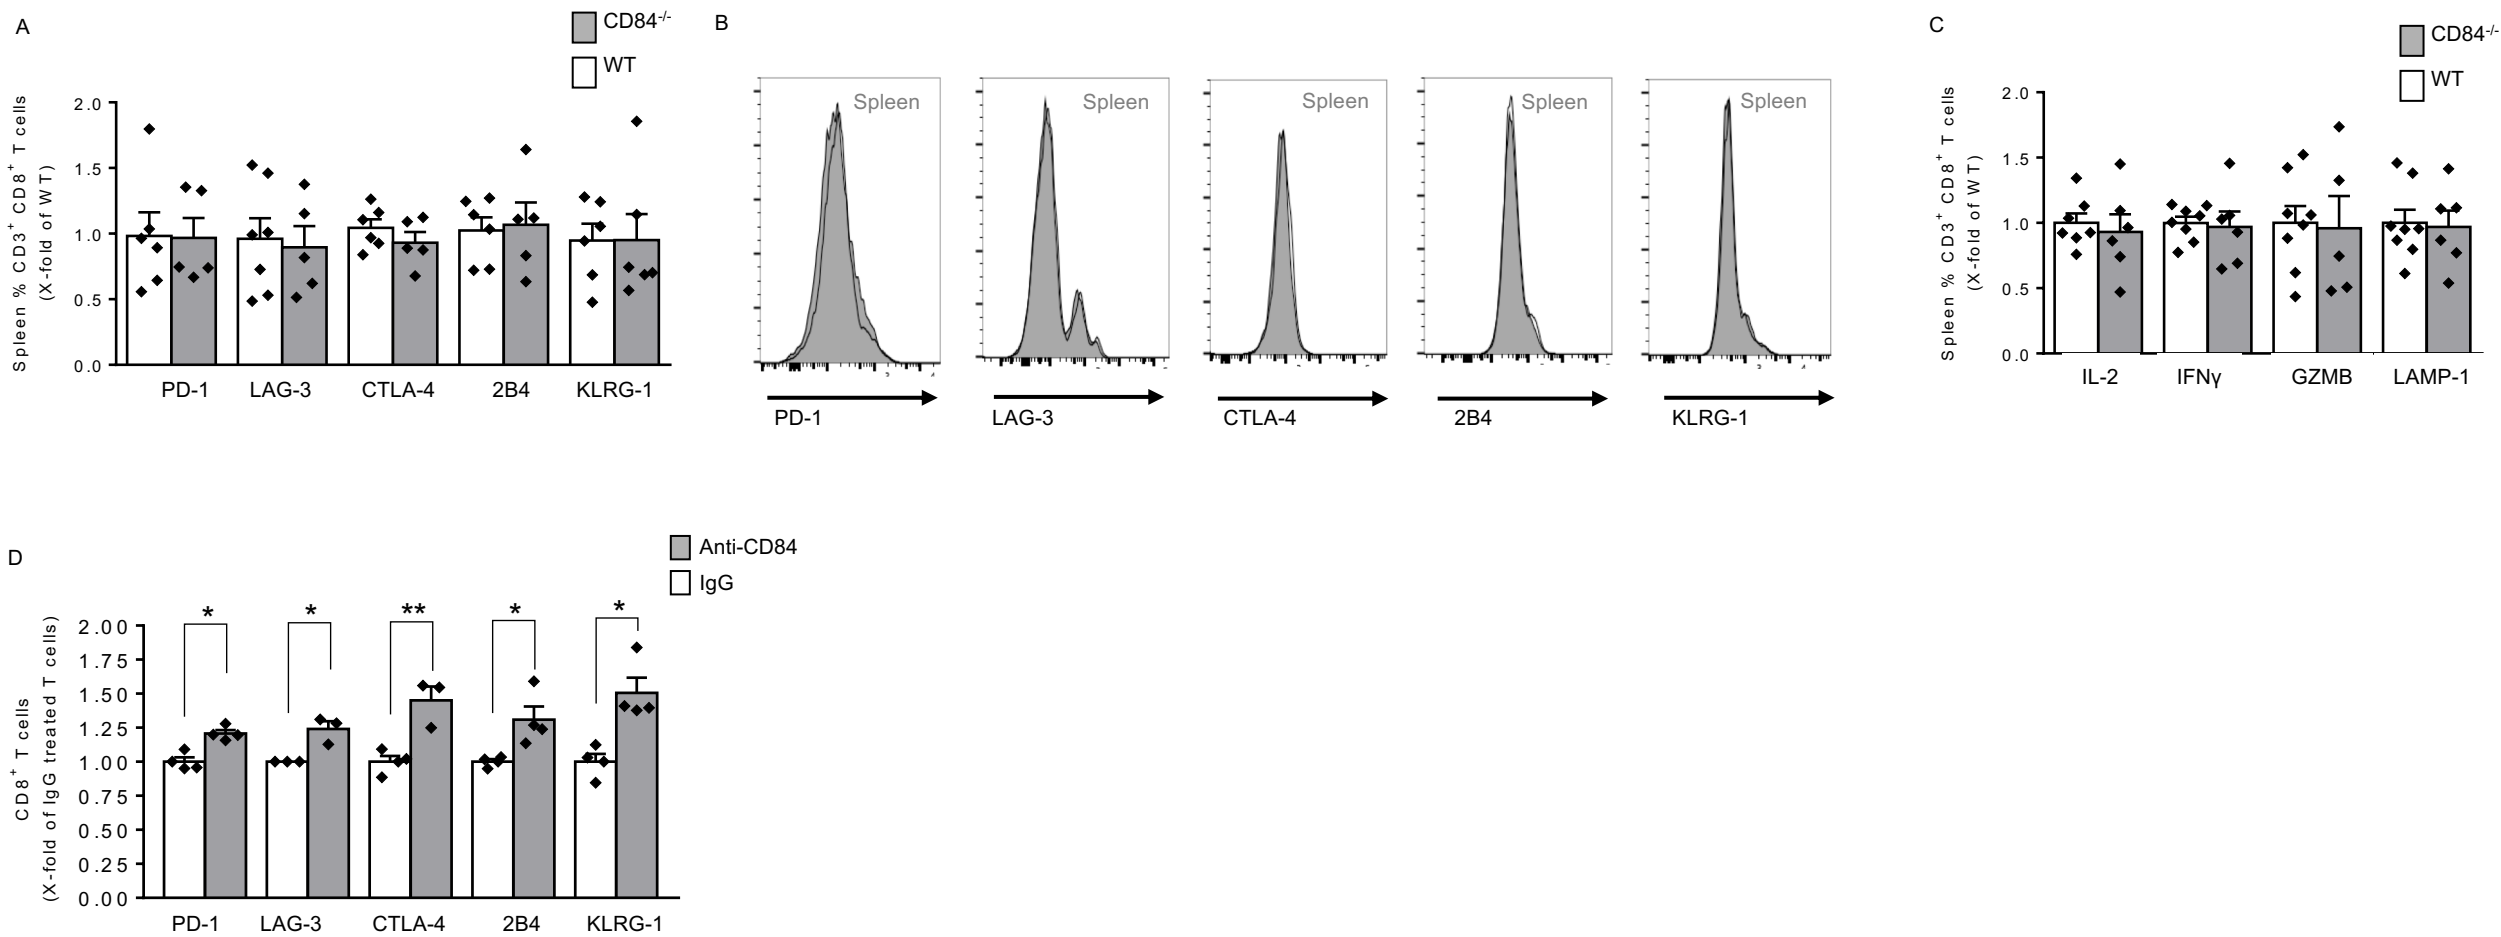

Fig S6-WT and CD84<sup>-/-</sup> CD8 T cells respond similarly to activation.

(A-C) Healthy CD84<sup>-/-</sup> and WT splenic cells were cultured for 24 hrs with anti-CD3 and in the last 2 hours of culture with brefeldin-A. CD8 T cells were stained for the (A-B) exhaustion markers: PD-1, Lag-3, CTLA-4, 2B4, KLRG-1, and (C) the cytokines/cytotoxic markers: IFN- $\gamma$ , IL-2, Granzyme B, and LAMP-1 (n=6-8). (D) Enriched splenic T cells from E $\mu$ -TCL1 sick mice were stimulated with anti-CD84 antibody and stained for CD8 and PD-1, LAG-3, CTLA4, 2B4 and KLRG-1 (n=3-4, Two tailed Paired T-test, \*p<0.05, \*\*p<0.01).

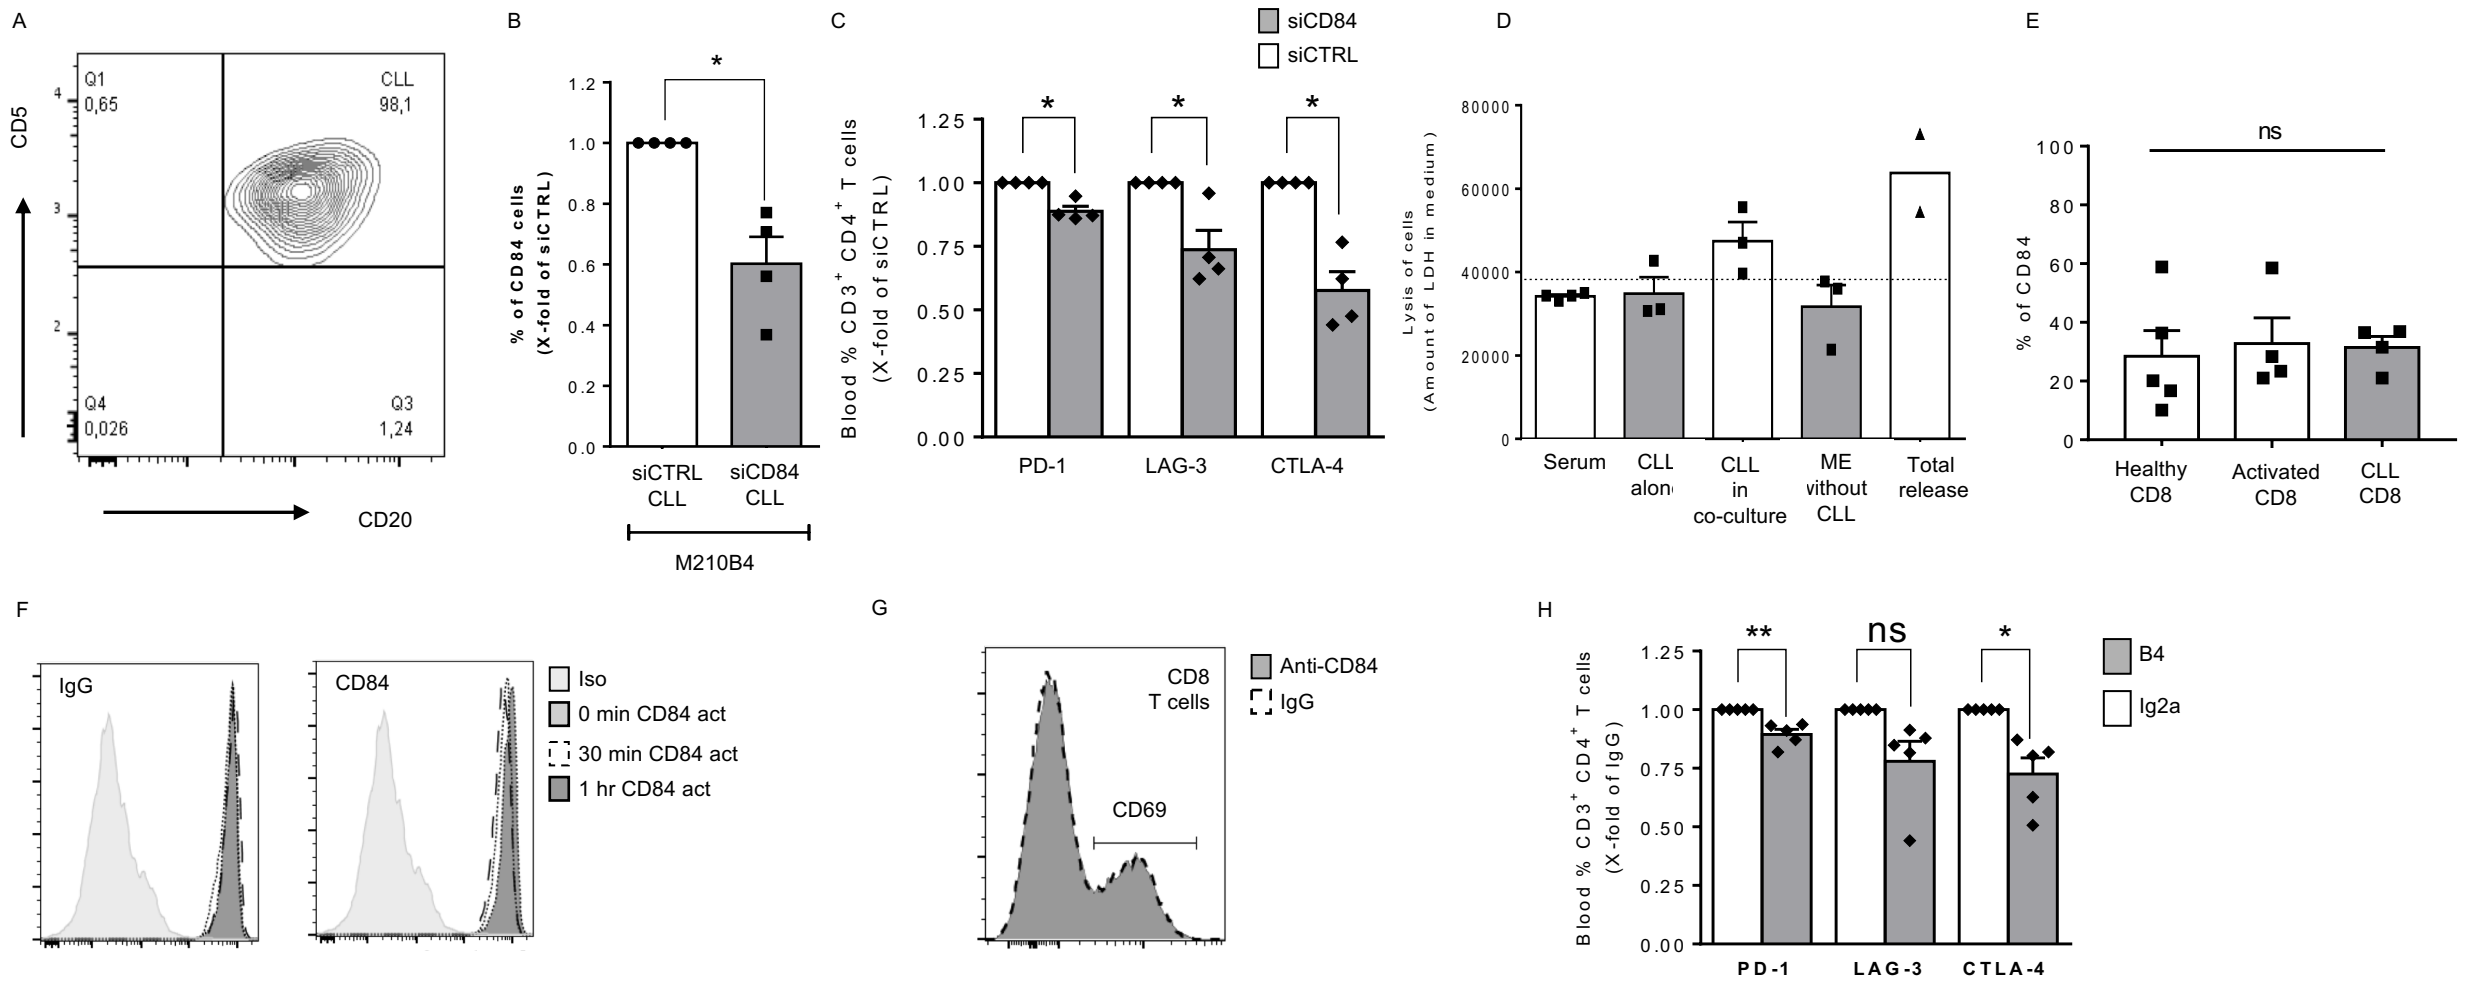

Fig S7- CD84 regulates PD-L1 and T cell function in human CLL patients.

(A) Lymphocytes from whole CLL blood samples were purified by Ficoll gradient, and CLL cells were then isolated using CD19 beads. (B) Purified CLL cells were treated with siCD84 or siCTRL and cultured for 24 hrs; a 48 hr co-culture was then established M210B4 cells. CD84 expression on M210B4 derived from the co-culture was analyzed by FACS analysis (n=4, Two tailed Paired T-test, p<0,05). (C) CD4 T cell expression of PD-1, Lag3 and CTLA-4 following co-culture with siCD84 treated CLL or siCTRL treated CLL (n=4, Two tailed Paired T-test, \*p<0,05). (D) Amount of lysed cells, measured by LDH release in medium in the different culture conditions (ME = microenvironment, medium was replaced for all conditions 24 hrs after treatment with siRNA). (E) CD84 expression was determined on healthy, healthy activated (CD3, CD28) and CLL derived purified human T cells (CD3 beads) (n=4-5, Two tailed T-test, ns p = non significant). (F-G) Purified T cells were stimulated with anti-CD84 or a control antibody IgG (F) and CD69 (G) expression levels were determined (histograms representative of n=2-3 independent experiments). (H) Lymphocytes from whole CLL blood samples were purified by Ficoll gradient, and CLL cells were then isolated with CD19 beads and treated with the B4 antagonistic CD84 antibody or control IgG2a, and cultured for 24 hrs; a 48 hr co-culture was then established with the non-CLL population. Graph shows CD4 T cell expression of PD-1, Lag3 and CTLA-4, following co-culture with B4 treated or IgG2a treated CLLs (n=5, Two tailed Paired T-test, \*\*p<0,01, \*p<0,05, ns p = 0,06).

| Patient | Age | Sex | Binet   | WBC <sup>a</sup><br>K/ul | State of disease                  | previous<br>therapy                 | IGHV <sup>a</sup> ,<br>c | CD38% <sup>a,b</sup> | ZAP70 <sup>c</sup> | FISH <sup>d</sup>          | Figure                        |
|---------|-----|-----|---------|--------------------------|-----------------------------------|-------------------------------------|--------------------------|----------------------|--------------------|----------------------------|-------------------------------|
| 1       | 74  | F   | Rai III | 90                       | progressive                       | no                                  | 1.5y                     | 1                    | 0                  | ND                         | 1A                            |
| 2       | 68  | M   | A       | 24.9                     | stable                            | no                                  | ND                       | 0                    | ND                 | ND                         | 1A                            |
| 3       | 62  | F   | B       | 99                       | Progressive                       | no                                  | U                        | 83                   | ND                 | ND                         | 1A                            |
| 4       | 57  | M   | A       | 142                      | Progressive                       | ND                                  | ND                       | ND                   | ND                 | ND                         | 1B, 6D, 6F, 2C, 2D, 2E        |
| 5       | 84  | M   | A       | 35                       | Stable                            | ND                                  | ND                       | 8                    | ND                 | ND                         | 1B, 6E, 6G,<br>6A, 2I, 6L, 6J |
| 6       | 61  | M   | Rai II  | 173                      | Progressive                       | no                                  | 6m                       | 11%                  | 11%                |                            | 1B                            |
| 7       | 70  | M   | C       | 156                      | Progressive                       | COP-R                               | ND                       | 78                   | ND                 | ND                         | 1B                            |
| 8       | 50  | M   | C       | 99                       | Progressive                       | FCR                                 | ND                       | ND                   | ND                 | N/A                        | 1C                            |
| 9       | ND  | ND  | ND      | ND                       | ND                                | ND                                  | ND                       | ND                   | ND                 | ND                         | 1C                            |
| 10      | 69  | M   | C       | 110                      | Stable                            | Chlorambucil +<br>Rituximab         | ND                       | ND                   | ND                 | 13q-<br>65%<br>11q-<br>98% | 1C, 1F, 6E, 6G, 6I            |
| 11      | 72  | F   | A       | 55.5                     | Indolent                          | No                                  | ND                       | ND                   | ND                 | N/A                        | 1C, 1D, 1G, 6A, 6B,           |
| 12      | 81  | M   | B       | 149.6                    | Chlorambucil +<br>Rituximab       | Progressive<br>disease              | ND                       | ND                   | ND                 | N/A                        | 1C, 1F, 1G, 6F                |
| 13      | 82  | M   | A       | 30,5                     | Indolent course                   | No                                  | ND                       | ND                   | ND                 | N/A                        | 6B, 6C                        |
| 14      | 85  | M   | A       | 27.4                     | Indolent course                   | No                                  | ND                       | ND                   | ND                 | N/A                        | 6B, 6C                        |
| 15      | 64  | F   | C       | 150                      | Stable                            | no                                  | M                        | 4                    | negative           | ND                         | 6B, 6C                        |
| 16      | 74  | M   | A       | 62                       | Stable                            | ND                                  | ND                       | 27                   | ND                 | ND                         | 6D, 6F,                       |
| 17      | 60  | F   | A       | 101.72                   | Progressive                       | no                                  |                          | 8                    | ND                 | ND                         | 6D, 6F                        |
| 18      | 69  | M   | Rai 0   | 49.7                     | Stable                            | no                                  | 14m                      | 5                    | ND                 | ND                         | 6D, 6E, 6F, 6G,<br>6I         |
| 19      | 63  | F   | A       | 70                       | Progressive                       | ND                                  | ND                       | 27                   | ND                 | ND                         | 6G                            |
| 20      | 60  | M   | C       | 37.7                     | Progressive<br>disease            | FCR, BR,<br>Ofatumumab<br>Ibrutinib | ND                       | ND                   | ND                 | Trisomy<br>12<br>17q-      | 6I                            |
| 21      | 79  | M   | A       | 27,8                     | Indolent course                   | No                                  | ND                       | ND                   | ND                 | N/A                        | 7A, 7B, 7C                    |
| 22      | 51  | M   | C       | 80                       | Progressive                       | no                                  | U                        | 0                    | ND                 | ND                         | 7A, 7B, 7C                    |
| 23      |     | M   | A       | 200                      | Indolent course                   | No                                  | ND                       | ND                   | ND                 | N/A                        | 7A, 7B                        |
| 24      | 68  | F   | C       | 80                       | progressive                       | ND                                  | ND                       | ND                   | 3                  | ND                         | 7A, 7B, 7C,<br>6A,<br>2I      |
| 25      | 73  | M   | A       | 43.4                     | Indolent,<br>without<br>treatment | No                                  | NA                       | NA                   | NA                 | NA                         | 6A, 2I, 2C, 2D, 2E            |
| 26      | 84  | M   | A       | 62                       | progressive                       | NO                                  | U                        | 65                   | n/d                | trisomy<br>12              | 6A, 2I                        |
| 27      | 52  | M   | C       | 86                       | progressive                       | NO                                  | M                        | 0                    | n/d                | normal                     | 2C, 2D                        |
| 28      | 80  | M   | A       | 20.6                     | Indolent,<br>without<br>treatment | No                                  | NA                       | 0%                   | NA                 | NA                         | S6E                           |
| 29      | 59  | M   | B       | 217                      | progressive                       | NO                                  | U                        | 0                    | n/d                | del13q                     | S6E                           |
| 30      | 64  | M   | B       | 40                       | progressive                       | NO                                  | N/D                      | 10                   | pos                | trisomy<br>12              | S6E                           |
| 31      | 65  | M   | B       | 249                      | progressive                       | NO                                  | U                        | n/d                  | neg                | del13q                     | S6E, 2F                       |
| 32      | 66  | M   | A       | 20                       | progressive                       | NO                                  | M                        |                      |                    |                            | 6G, 6H, 6K, 6L, S1A,<br>6J    |
| 33      | -   | -   | -       | -                        | -                                 | -                                   | -                        | -                    | -                  | -                          | 6G, 6H                        |
| 34      | 61  | M   | A       | 83.11                    | stable                            | no                                  | N/D                      | negative             | N/D                | t12                        | 6G, 6H, 6K, 6L                |
| 35      | 62  | M   | A       | 52.86                    | stable                            | No                                  | N/D                      | negative             | N/D                | N/D                        | 6G, 6H                        |
| 36      | 69  | M   | A       | 16.94                    | stable                            | No                                  | N/D                      | negative             | N/D                | N/D                        | 6H, 6J                        |
| 37      | 66  | M   | A       | 52.03                    | stable                            | No                                  | N/D                      | negative             | N/D                | N/D                        | 6K, 6L, 6J                    |
| 38      | 67  | M   | A       | 61.36                    | stable                            | No                                  | N/D                      | negative             | 23                 | N/D                        | S1A                           |
| 39      | 73  | M   | A       | 24.85                    | stable                            | No                                  | N/D                      | negative             | N/D                | N/D                        | S1A                           |
| 40      | 69  |     | B       | 126                      | progressive                       | NO                                  | U                        | 0                    | n/d                | trisomy<br>12              | 2F                            |

|    |    |   |   |       |             |    |     |          |     |        |    |
|----|----|---|---|-------|-------------|----|-----|----------|-----|--------|----|
| 41 | 70 | M | A | 247   | progressive | NO | n/d | n/d      | n/d | del17p | 2F |
| 42 | 65 | M | A | 100   | stable      | NO | M   | 0        | pos | del13q | 2F |
| 43 | 61 | F | A | 24.08 | stable      | No | N/D | negative | N/D | N/D    | 6M |
| 44 | 69 | M | A | 26.46 | stable      | No | N/D | positive | 9   | N/D    | 6M |
| 45 | 82 | M | A | 25.4  | stable      | No | N/D | negative | N/D | N/D    | 6M |

**Supplementary table 1**-Patient data

<sup>a</sup> Lymphocyte count at bleeding, x10<sup>3</sup>/μL  
<sup>b</sup> mutation status: mutated (M), unmutated (U)  
<sup>c</sup> N/D – not determined, + positive, - negative  
<sup>d</sup> Flouresence in situ hibridisation; N/A, not available  
FCR, Fludarabine, Cyclophosphamide, Rituximab; BR, Bendamusine, Riruximab.N

**Supplementary table 2-** List of antibodies used

| Target     | Species     | Fluorophore     | Company               | Clone          |
|------------|-------------|-----------------|-----------------------|----------------|
| CD5        | Mouse       | BV421           | Biolegend             | 53-7.3         |
| PD-L1      | Human       | PE/CY7          | Biolegend             | 29E.2A3        |
| PD-L1      | Mouse       | BV711           | Biolegend             | 10F.9G2        |
| B220/CD45R | Human/Mouse | FITC or APC     | Biolegend             | RA3-6B2        |
| CD19       | Mouse       | FITC/PE         | Biolegend             | 6D5            |
| CD19       | Human       | APC-CY7         | Biolegend             | HIB19          |
| CD20       | Human       | FITC            | Biolegend             | 2H7            |
| CD3        | Mouse       | APC-CY7         | Biolegend             | 145-2C11       |
| CD3        | Human       | Pacific blue    | Biolegend             | UCHT1          |
| CD4        | Mouse       | FITC/PERCP      | Biolegend             | RMA4-5         |
| CD4        | Human       | FITC            | Biolegend             | OKT4           |
| CD8        | Mouse       | BV711           | Biolegend             | 53-6.7         |
| CD8        | Human       | APC-CY7         | Biolegend             | HIT8a          |
| PD1        | Mouse       | PE/CY7          | Biolegend             | 29F.1A12       |
| PD1        | Human       | BV711           | BD Bioscience         | EH12.1         |
| Lag-3      | Mouse       | PE              | BD Bioscience         | C9B7W          |
| Lag-3      | Human       | APC             | Biolegend             | 11C3C65        |
| CTLA-4     | Mouse       | APC             | Biolegend             | UC10-4B9       |
| CTLA-4     | Human       | PE-CY7          | Biolegend             | L3D10          |
| 2B4        | Mouse       | FITC            | Biolegend             | m2B4.(B6)45B.1 |
| KLRG-1     | Mouse       | BV421/efluor405 | Biolegend/eBioscience | 2F1/KLRG1      |
| LAMP-1     | Mouse       | PE              | Biolegend             | 1D48           |
| Granzyme B | Mouse/Human | APC             | Biolegend             | GB11           |
| IL-2       | Mouse       | PE-CY7          | Biolegend             | JES6-5H4       |
| IFNgamma   | Mouse       | Pacific blue    | Biolegend             | XMG1.2         |
| IFNgamma   | Human       | PE-CY7          | Biolegend             | B27            |
| pAKT       | Mouse/Human | -               | Cell signaling        | D25E6          |
| pS6        | Mouse/Human | -               | Cell signaling        | D57.2.2E       |
| pERK       | Mouse/Human | -               | Cell signaling        | D13.14.4E      |
| Actin      | Mouse/Human | -               | SCBT                  | H-6            |
| IkB        | Mouse/Human | -               | BD bioscience         | 25/IkBα/MAD-3  |
| pSTAT3     | Mouse/Human | -               | Cell signaling        | D3A7           |

Isotype controls were used according to the data sheets.

### Supplementary Table 3: Primer Sequences

#### Real-Time Primers

| <b>target</b> | <b>species</b> | <b>forward primer</b>   | <b>reverse primer</b>   |
|---------------|----------------|-------------------------|-------------------------|
| Bcl2          | human          | GGATCAGGGAGTTGGAAG      | GCACTGCCAAACGGAG        |
| CD84          | human          | TTGTTCCGTTTGTTC AAGAG   | CGGAATAAACTGTGTTC ACTG  |
| PSMB2         | human          | AGGTTGGCAGATTCAGGATG    | AGAGGGCAGTGGAAC TCCTT   |
| PD-L1         | human          | TGGCATTTGCTGAACGCATTT   | AGTGCAGCCAGGTCTAATTGT   |
| Bcl2          | mouse          | GCTACCGTCGTGACTT        | GCCGGTTCAGGTACTC        |
| Rpl32         | mouse          | TTAAGCGAAACTGGCGGGAAAC  | TTGTTGCTCCCATAACCGATG   |
| CD84          | mouse          | ATATAGCTGGAGTCCCTTTGGAG | AAAGAGCACGGCCAATCCTC    |
| PD-L1         | mouse          | GAGCTGATCATCCCAGAACTGC  | GACCGTGGACACTACAATGAGGA |

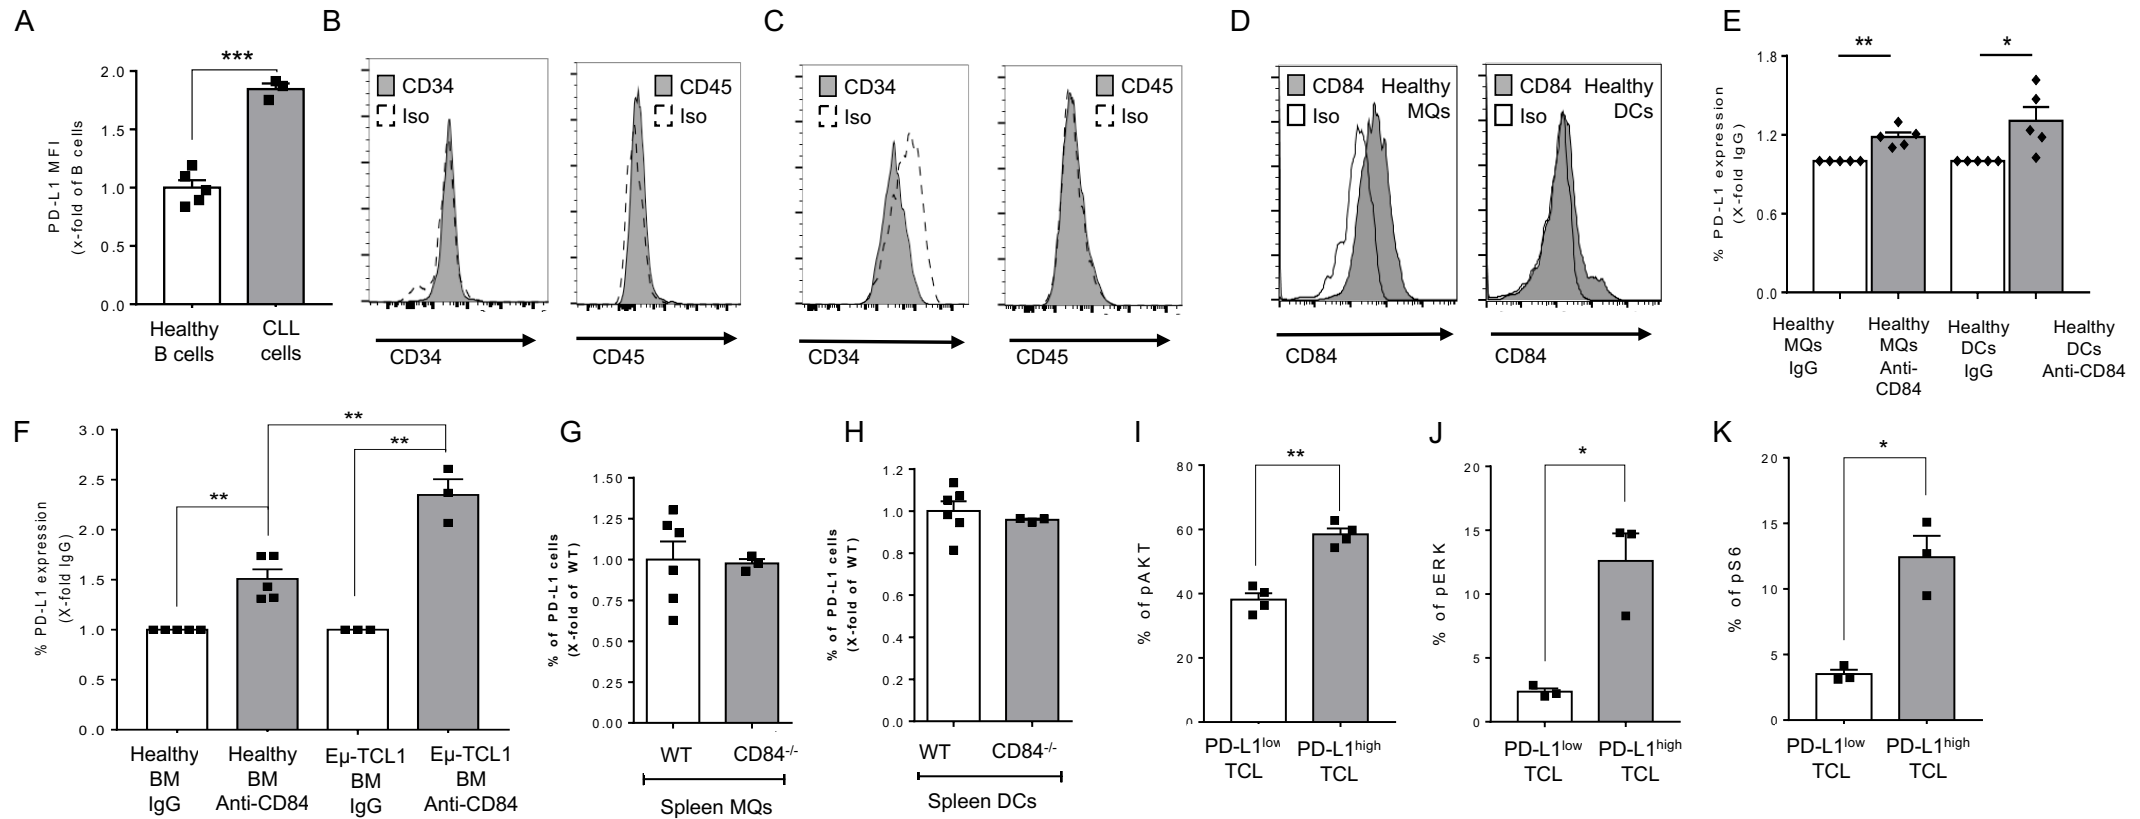

**Fig S1- CD84 regulates PD-L1 expression on CLL cells and their microenvironment.** **(A)** CLL cells or healthy B cells were analyzed for PDL1 expression by FACS analysis. Graph shows MFI levels of PD-L1 (n=3-5, \*\*\*p<0,001). **(B-C)** Human **(B)** and mouse **(C)** adherent cells derived from bone marrow cultures stained for CD34 and CD45. Gray- staining compared to black dashed line. **(D-E)** Splenic MQs and DCs **(D)** from healthy animals were analyzed for CD84 cell surface expression, or **(E)** stimulated with anti-CD84 (5 µg/ml) or control IgG antibodies. PD-L1 cell surface expression was analyzed on the activated cells (n=5, \*p<0.05, \*\*p<0.01). **(F)** Bone marrow stromal cells were harvested from either healthy or Eμ-TCL1 sick mice and cultured until confluent. The cells were then stimulated with anti-CD84 (4 µg/ml) for 48 hrs, and their PD-L1 expression was determined (n=3-5, \*\*p<0.01). **(G-H)** Expression of PD-L1 on splenic monocytes and DCs derived from healthy wt and CD84<sup>-/-</sup> mice (n=3-6). **(I-K)** Purified splenocytes from Eμ-TCL mice, were gated for CD5 CD19 and PD-L1, and analyzed for pAkt **(G)**, pS6 **(H)**, and pERK **(I)** (n=3, \*p<0.05, \*\*p<0.01).

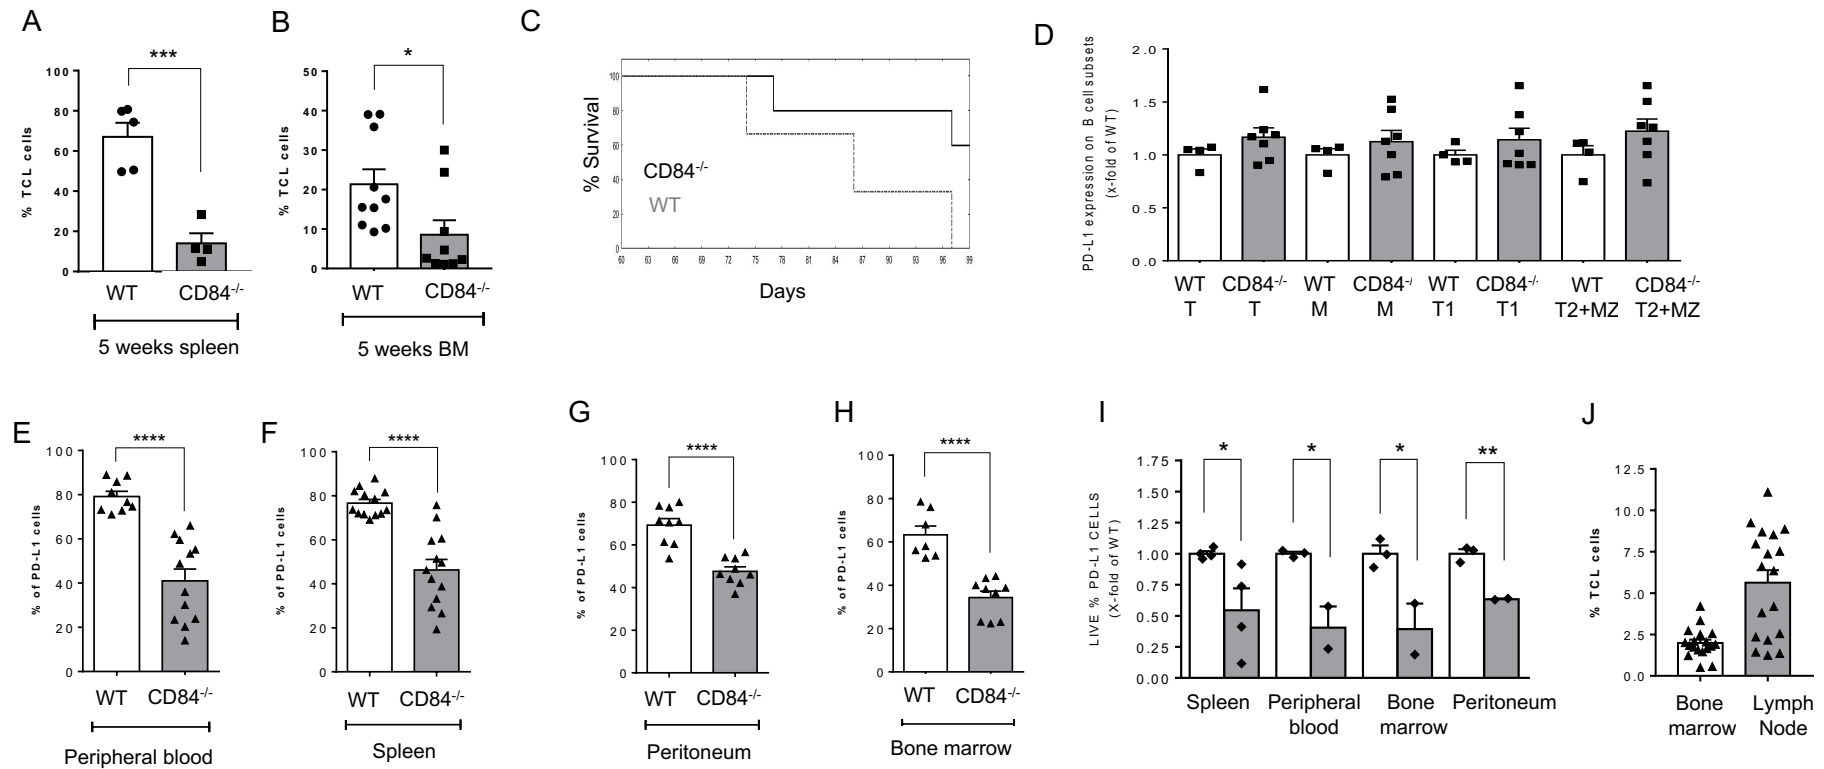

**Fig S2- Decreased PD-L1 expression and elevated survival in the absence of CD84 in the tumor microenvironment.**

Eμ-TCL1 splenocytes ( $4 \times 10^7$ ) were injected i.v. into the tail vein of C57BL/6 wt or CD84<sup>-/-</sup> mice. (A-B) After 5 weeks, the mice were sacrificed and the number of Eμ-TCL1 cells was determined in spleen (A) and BM (B) (n=4-10, \*\*p<0,01, \*p<0,05). (C) Mice were monitored daily for survival. The figure displays the survival curves of CD84<sup>-/-</sup> mice compared to WT mice (n = 3, 5, p<0.05, Log-rank test, Chi square 2.863 df:1, one-tailed Chi-square). (D) Splenic B cells from healthy WT and CD84<sup>-/-</sup> mice were stained for PD-L1 expression (T – total B cells, M – Mature B cells) (n=4-7, p=0.2194). (E-I) Eμ-TCL1 splenocytes ( $4 \times 10^7$ ) were injected i.v. into the tail vein of C57BL/6 wt or CD84<sup>-/-</sup> mice. After 14-21 days, the mice were sacrificed and the percentage of PD-L1 positive cells was analyzed in WT and CD84<sup>-/-</sup> in peripheral blood (E), spleen (F), peritoneum (G), bone marrow (H) (n=7-11, \*\*\*\*p<0,0001), and in the live Annexin-V and 7AAD negative population (I) (n=2-4, \*\*p<0,01, \*p<0,05). (J) Percentage of Eμ-TCL1 cells in BM and spleen at 21 days after i.v. injection of Eμ-TCL1 splenocytes (n=17-18).

Fig S3

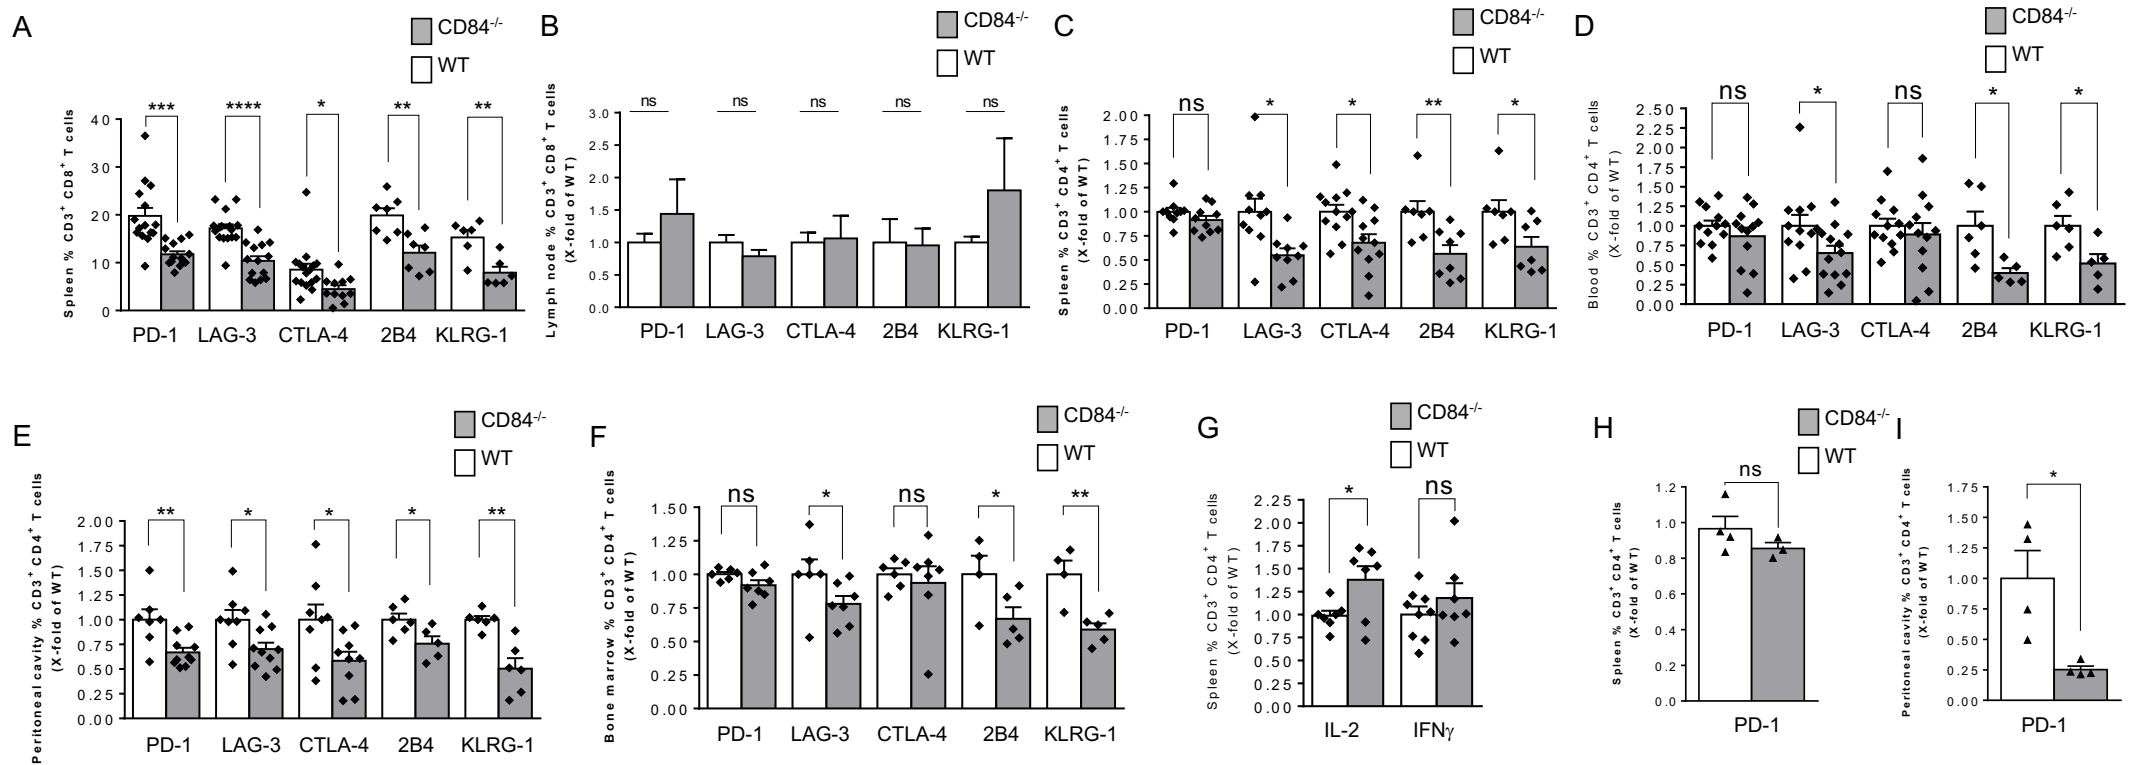**Fig S3-Reduction in exhausted T cell phenotype in the CD84<sup>-/-</sup> environment.**

(A-F) E $\mu$ -TCL1splenocytes ( $4 \times 10^7$ ) were injected i.v. into the tail vein of C57BL/6 wt or CD84<sup>-/-</sup> mice. After 14-21 days, the mice were sacrificed. (A-B) Percent of PD-1, Lag-3, CTLA-4, 2B4, and KLRG-1 positive CD8 T cells in (A)spleen ( $n=6-11$ , \*\*\*\* $p<0.0001$ , \*\*\* $p<0.001$ , \*\* $p<0.01$ , \* $p<0.05$ ) and (B) lymph node ( $n=3-9$ ). (C-F) Expression of the exhaustion markers PD-1, Lag-3, CTLA-4, 2B4 and KLRG1 was determined on CD4 in (C) spleen ( $n=6-11$ , ns = not significant, \* $p<0.05$ , \*\* $p<0.01$ ), (D) peripheral blood ( $n=5-11$ , ns  $p$  =, \* $p<0.05$ , ns  $p$  =), (E) peritoneal cavity ( $n=6-10$ , \* $p<0.05$ , \*\* $p<0.01$ ) and (F) bone marrow ( $n=4-7$ , ns = not significant, \* $p<0.05$ , ns = not significant, \*\* $p<0.01$ ). (G) Splenic cells were cultured for 24 hrs with anti-CD3, and in the last 2 hours of culture with brefeldin-A. CD4 T cells were then analyzed for IFN- $\gamma$  and IL-2 ( $n=7-8$ , \* $p<0.05$ , ns = not significant). (H-I) BM cells ( $5 \times 10^6$ ) derived from 8-week-old E $\mu$ -TCL1 mice or negative control littermates (wt) were injected into lethally irradiated C57BL/6 (wt) or CD84-deficient (CD84<sup>-/-</sup>) mice. After 6 months, mice were killed, and the expression of PD-1 was determined on CD4 T cells in the spleen (H) and peritoneum (I) ( $n=3-4$ , \* $p<0.05$ , ns = not significant).

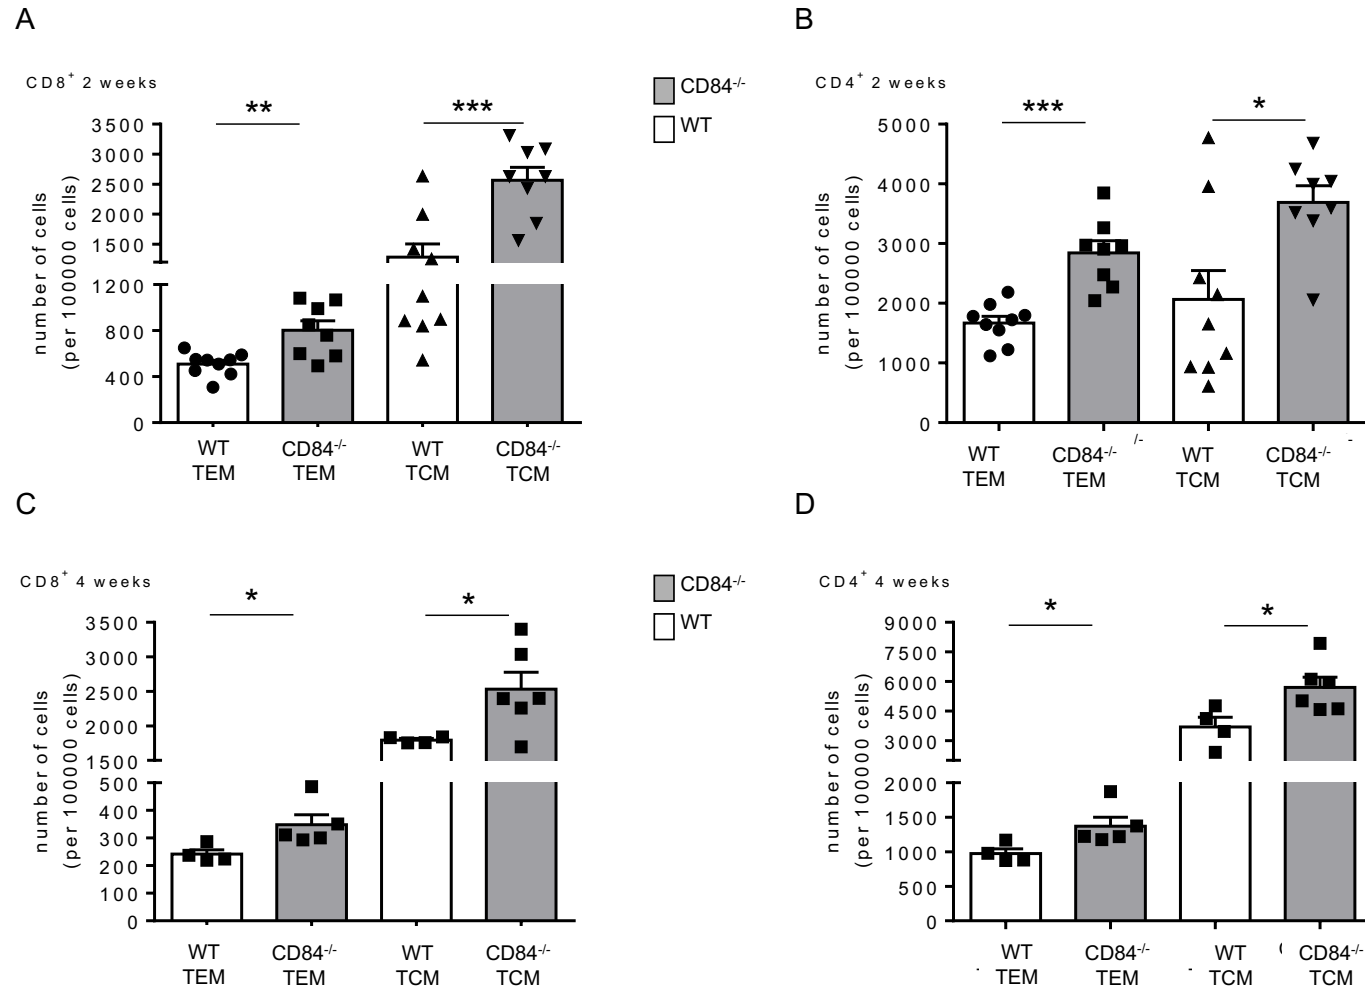

**Fig S4- The TEM and TCM populations are increased in the CD84<sup>-/-</sup> environment.**

E $\mu$ -TCL1 splenocytes ( $4 \times 10^7$ ) were injected i.v. into the tail vein of C57BL/6 wt or CD84<sup>-/-</sup> mice. After 14 (A-B), or 28 (C-D) days, the mice were sacrificed. Splenocytes were analyzed for CD8 (A,C), and CD4 (B,D). The number of TEM (CD44<sup>+</sup>, CD62L<sup>-</sup>) and TCM (CD44<sup>+</sup>, CD62L<sup>+</sup>) was determined by flow cytometry (n=4-9, \*p<0.05, \*\*p<0.01, \*\*\*p<0.001).

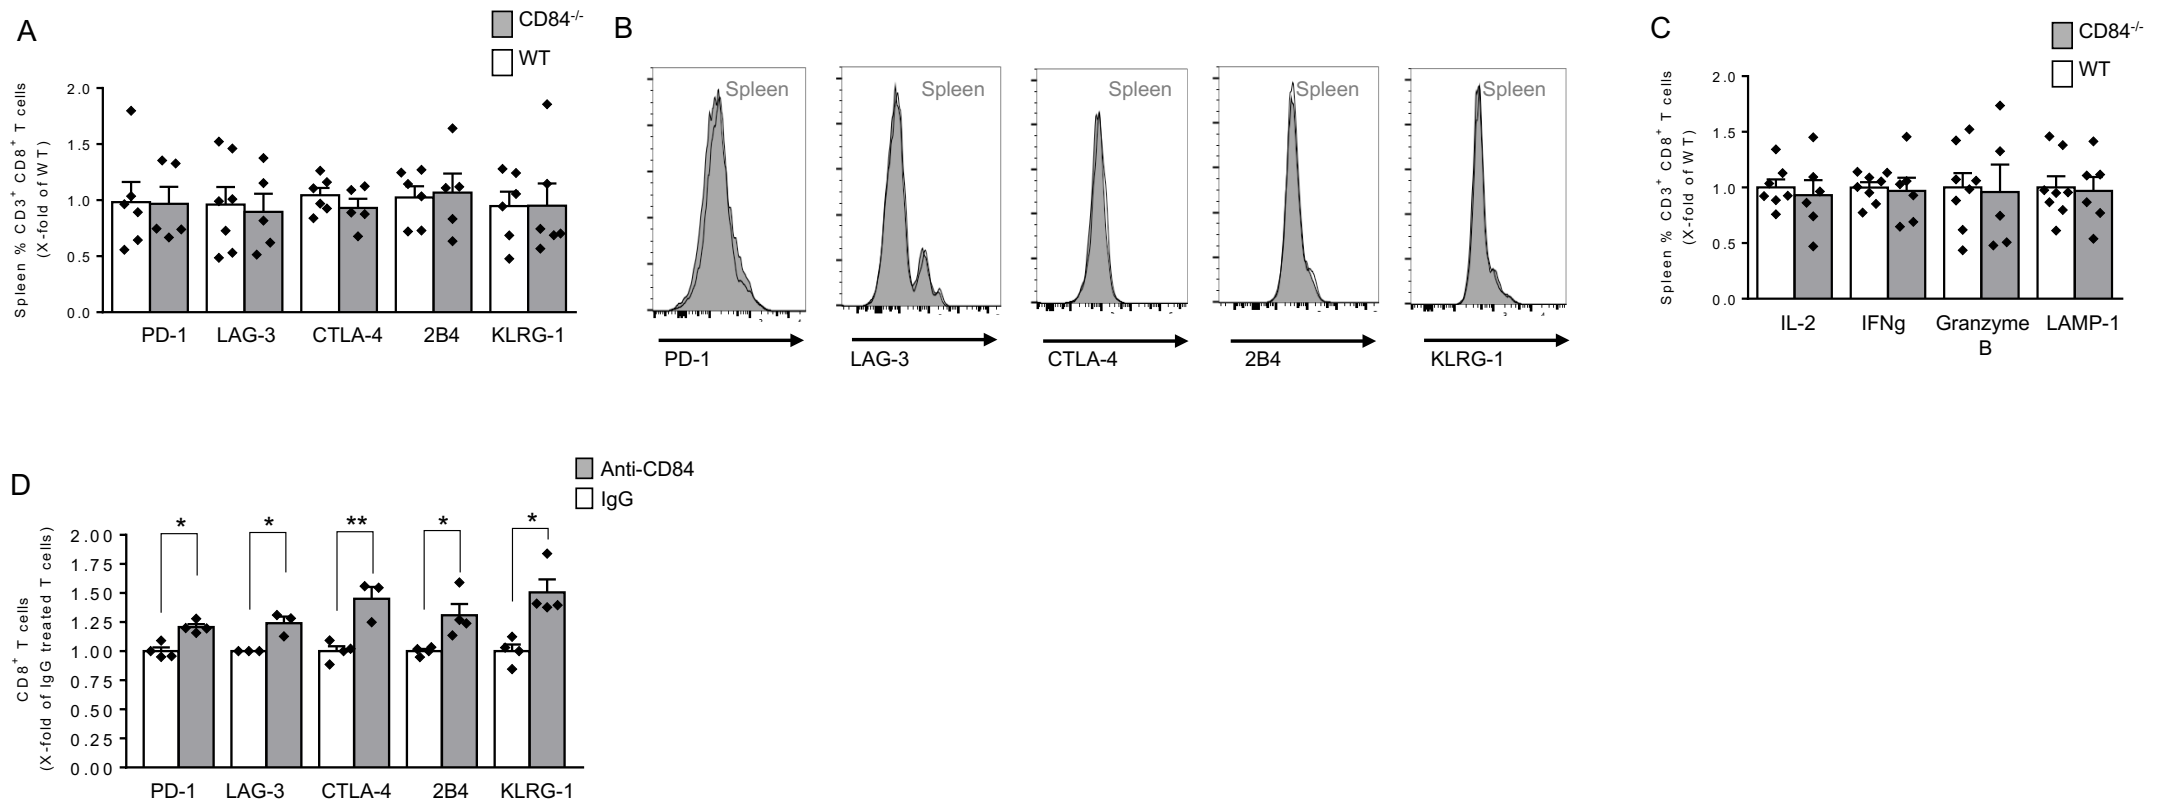

**Fig S5**-wt and CD84<sup>-/-</sup> CD8 T cells respond similarly to activation.

**(A-C)** Healthy CD84<sup>-/-</sup> and wt splenic cells were cultured for 24 hrs with anti-CD3 and in the last 2 hours of culture with brefeldin-A. CD8 T cells were stained for the (A-B) exhaustion markers: PD-1, Lag-3, CTLA-4, 2B4, KLRG-1, and (C) the cytokines/cytotoxic markers: IFN- $\gamma$ , IL-2, Granzyme B, and LAMP-1 (n=6-8, ns p = not significant). **(D)** Enriched splenic T cells from E $\mu$ -TCL1 sick mice were stimulated with anti-CD84 antibody and stained for CD8 and PD-1, LAG-3, CTLA4, 2B4 and KLRG-1 (n=3-4, \*p<0.05, \*\*p<0.01).

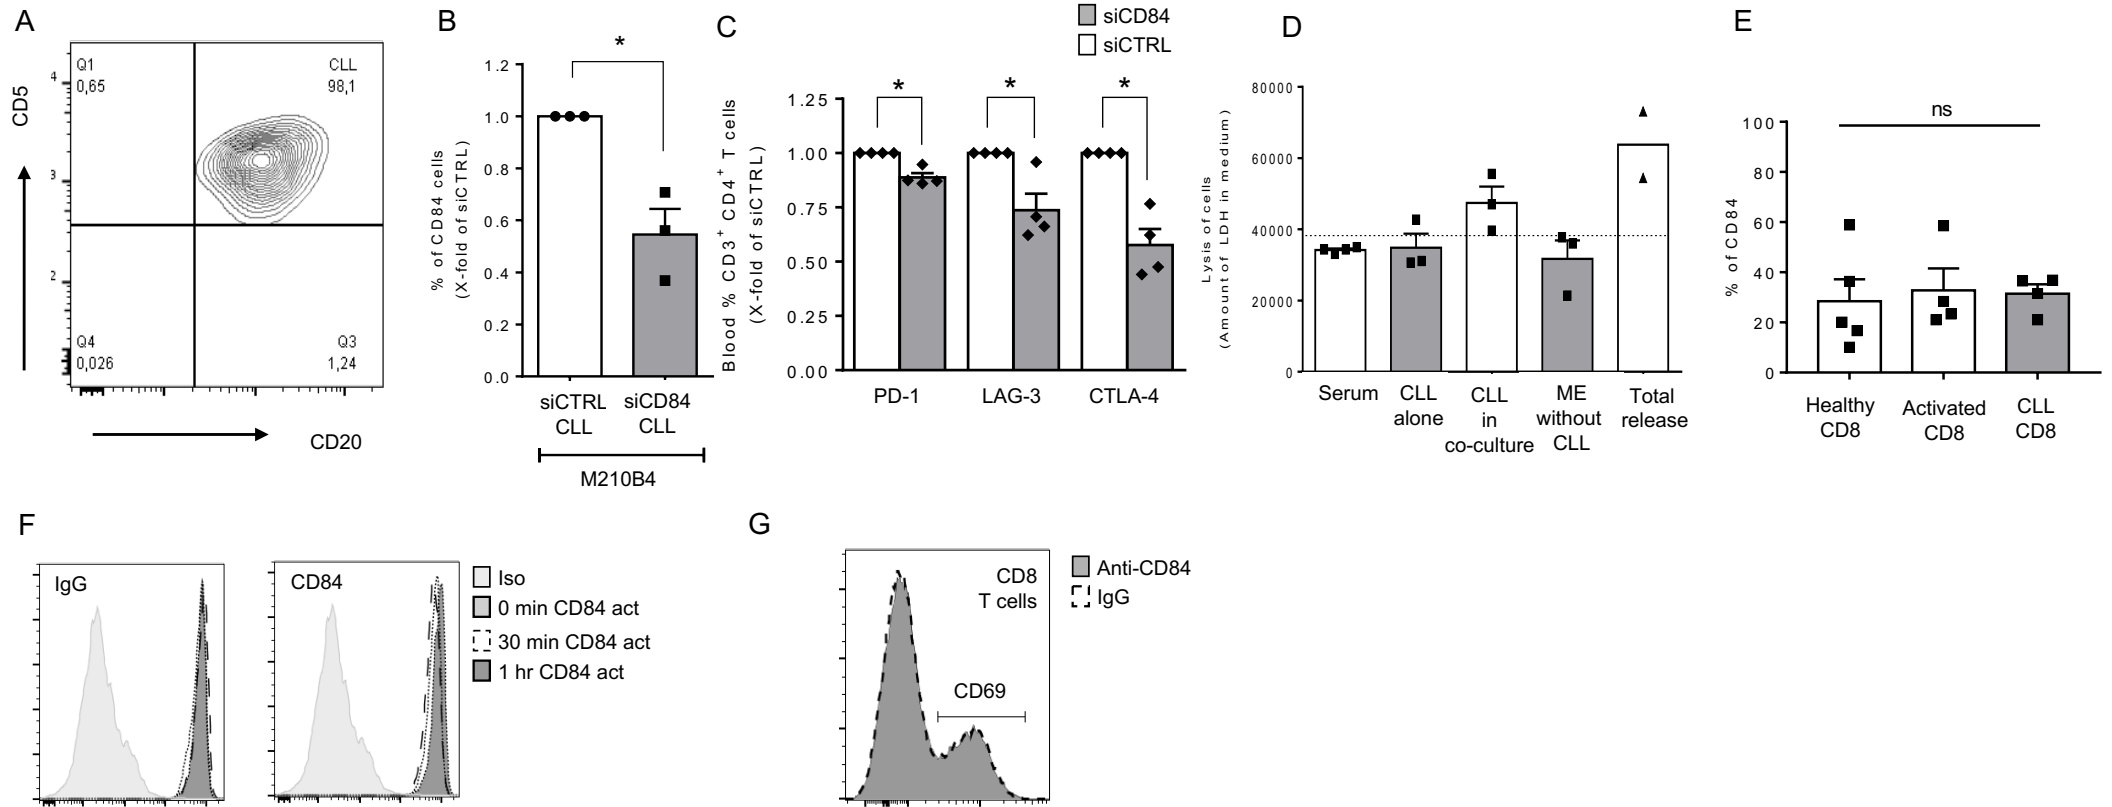

**Fig S6- CD84 regulates PD-L1 and T cell function in human CLL patients.** (A) Lymphocytes from whole CLL blood samples were purified by Ficoll gradient, and CLL cells were then isolated using CD19 beads. (B) Purified CLL cells were treated with siCD84 or siCTRL and cultured for 24 hrs; a 48 hr co-culture was then established M210B4 cells. CD84 expression on M210B4 derived from the co-culture was analyzed by FACS analysis (n=3, p<0,05). (C) CD4 T cell expression of PD-1, Lag3 and CTLA-4 following co-culture with siCD84 treated CLL or siCTRL treated CLL (n=4, \*p<0,05). (D) Amount of lysed cells, measured by LDH release in medium in the different culture conditions (ME = microenvironment, medium was replaced for all conditions 24 hrs after treatment with siRNA). (E) CD84 expression was determined on healthy, healthy activated (CD3, CD28) and CLL derived purified human T cells (CD3 beads) (n=4-5, ns p = non significant). (F-G) Purified T cells were stimulated with anti-CD84 or a control antibody IκB (F) and CD69 (G) expression levels were determined (n=2-3).

A

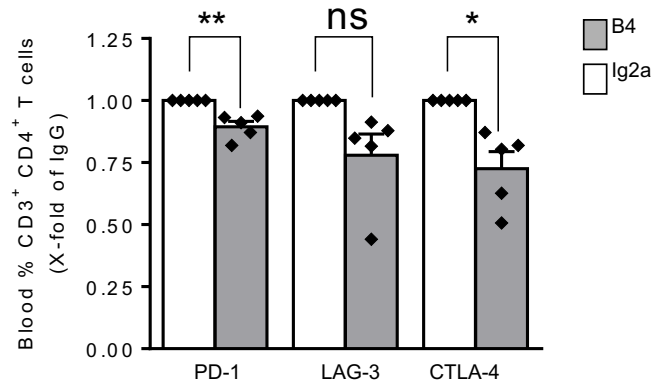

**Fig S7- Blocking CD84 on CLL cells affects CD4 T cells to a lesser extent than CD8.**

Lymphocytes from whole CLL blood samples were purified by Ficoll gradient, and CLL cells were then isolated with CD19 beads and treated with the B4 antagonistic CD84 antibody or control IgG2a, and cultured for 24 hrs; a 48 hr co-culture was then established with the non-CLL population. Graph shows CD4 T cell expression of PD-1, Lag3 and CTLA-4, following co-culture with B4 treated or IgG2a treated CLLs (n=5, \*\*p<0,01, \*p<0,05, <sup>ns</sup> p = 0,06).
